# Supplementary material for: Elevated expression of macrophage MERTK exhibits profibrotic effects and results in defective regulation of efferocytosis function in pulmonary fibrosis
Source: PubMed Central journal article supplement (PMC10148433; doi:10.1186/s12931-023-02424-3), 2023-04-29

# Supplementary Figure 1

A549

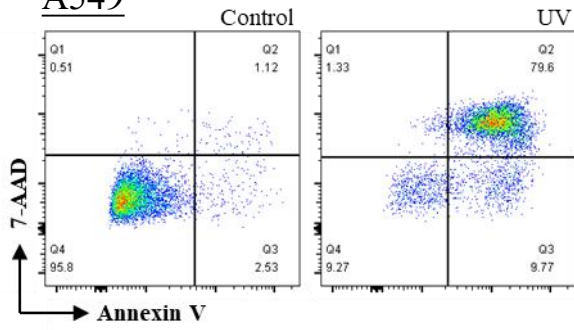

Apoptosis induction of A549

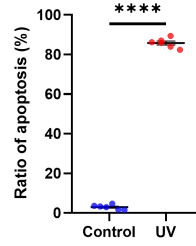

MLE12

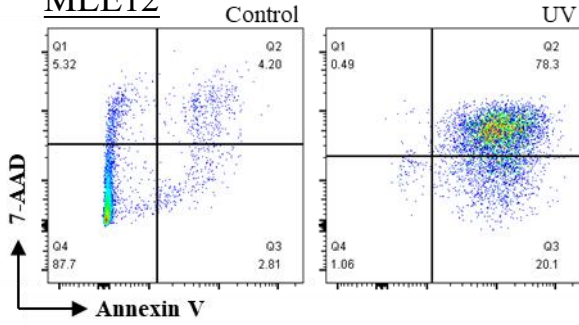

Apoptosis induction of MLE12

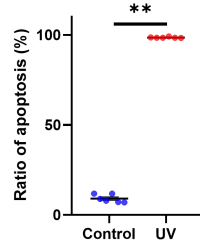

# Supplementary Figure 2

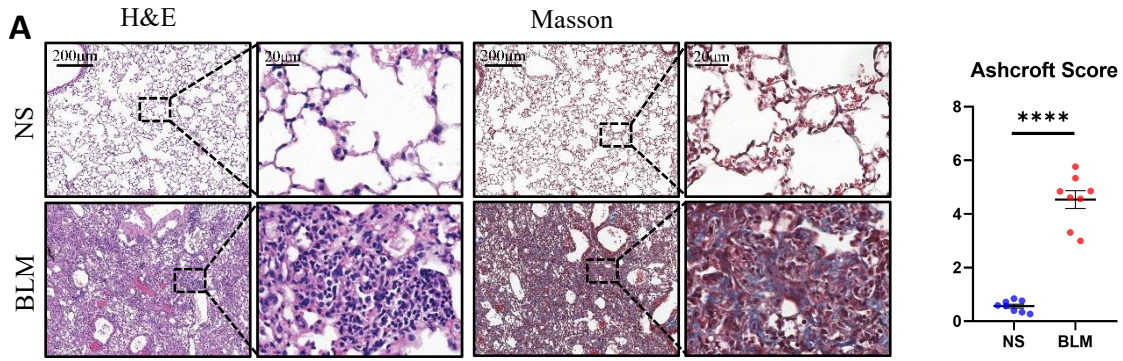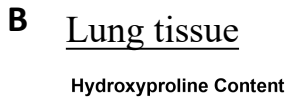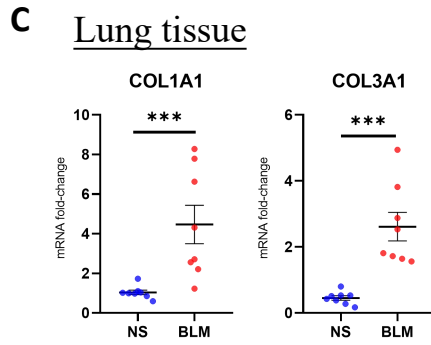

# Supplementary Figure 3

**A**

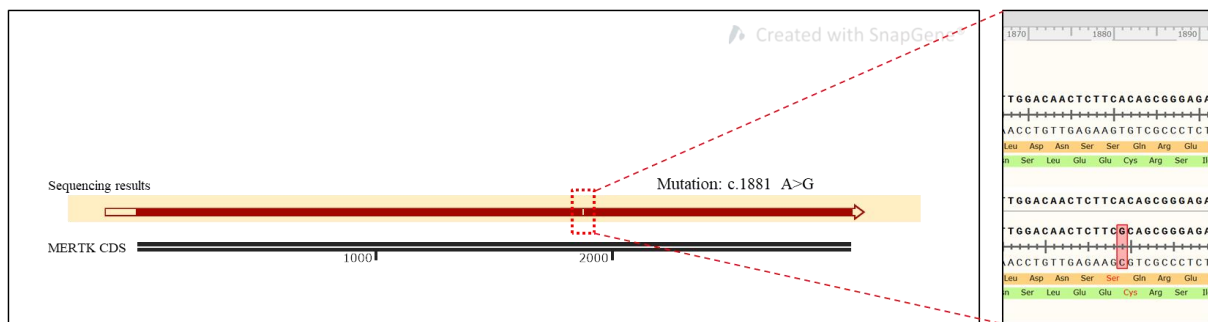

**B**

Descriptions | Graphic Summary | Alignments | Taxonomy

Sequences producing significant alignments

Download Select columns Show 100

select all 100 sequences selected

GenPept Graphics

| Description                                                                                           | Scientific Name         | Max Score | Total Score | Query Cover | E value | Per. Ident | Acc. Len | Accession      |
|-------------------------------------------------------------------------------------------------------|-------------------------|-----------|-------------|-------------|---------|------------|----------|----------------|
| <input checked="" type="checkbox"/> tyrosine-protein kinase Mer precursor [Homo sapiens]              | Homo sapiens            | 1928      | 1928        | 91%         | 0.0     | 99.90%     | 999      | NP_006334.2    |
| <input checked="" type="checkbox"/> MER receptor tyrosine kinase [Homo sapiens]                       | Homo sapiens            | 1919      | 1919        | 91%         | 0.0     | 99.90%     | 978      | AAG33129.1     |
| <input checked="" type="checkbox"/> c-mer proto-oncogene tyrosine kinase isoform CRA_a [Homo sapiens] | Homo sapiens            | 1928      | 1928        | 91%         | 0.0     | 99.80%     | 999      | EAW52096.1     |
| <input checked="" type="checkbox"/> unnamed protein product [Homo sapiens]                            | Homo sapiens            | 1921      | 1921        | 91%         | 0.0     | 99.39%     | 999      | BAG38172.1     |
| <input checked="" type="checkbox"/> tyrosine-protein kinase Mer isoform X2 [Pan troglodytes]          | Pan troglodytes         | 1816      | 1816        | 87%         | 0.0     | 99.04%     | 936      | XP_024210259.1 |
| <input checked="" type="checkbox"/> tyrosine-protein kinase Mer isoform X1 [Pan troglodytes]          | Pan troglodytes         | 1912      | 1912        | 91%         | 0.0     | 98.98%     | 999      | XP_515690.3    |
| <input checked="" type="checkbox"/> novel cellular proto-oncogene [Homo sapiens]                      | Homo sapiens            | 1909      | 1909        | 91%         | 0.0     | 98.98%     | 999      | AAB60430.1     |
| <input checked="" type="checkbox"/> tyrosine-protein kinase Mer isoform X1 [Pan paniscus]             | Pan paniscus            | 1907      | 1907        | 91%         | 0.0     | 98.98%     | 1227     | XP_034809442.1 |
| <input checked="" type="checkbox"/> tyrosine-protein kinase Mer [Gorilla gorilla gorilla]             | Gorilla gorilla gorilla | 1912      | 1912        | 91%         | 0.0     | 98.88%     | 999      | XP_030864129.1 |
| <input checked="" type="checkbox"/> tyrosine-protein kinase Mer isoform X1 [Pongo abelii]             | Pongo abelii            | 1895      | 1895        | 91%         | 0.0     | 98.27%     | 999      | XP_024097646.1 |

**C**

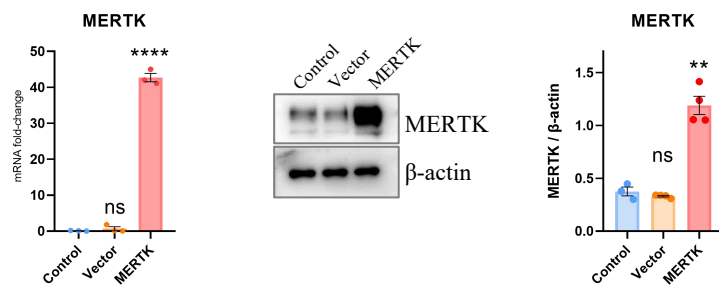

# Supplementary Figure 4

**A**

Human lung macrophages

Mouse lung macrophages

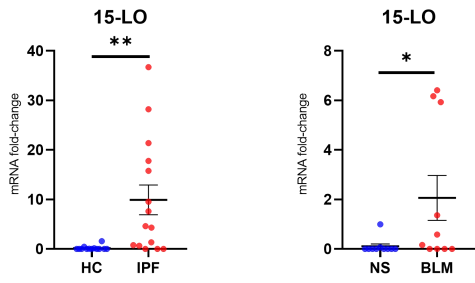

Supplement: 12931_2023_2424_MOESM1_ESM.pdf [file 12931_2023_2424_MOESM1_ESM.pdf]
